# Supplementary material for: Changes in Physical Activity Patterns Due to the Covid-19 Pandemic: A Systematic Review and Meta-Analysis
Source: MDPI journal article supplement (doi:10.3390/ijerph19042250), 2022-02-16
Supplement: s1 [file s1]

### Supplementary Table S1.

*Supplementary Table 1. Individual search terms for databases (10.06.2021).*

| Database              | Searchterm                                                                                                                                                                                                                                                                                                                                                                  | Matches     | Added to project<br>(without<br>doublettes) |
|-----------------------|-----------------------------------------------------------------------------------------------------------------------------------------------------------------------------------------------------------------------------------------------------------------------------------------------------------------------------------------------------------------------------|-------------|---------------------------------------------|
| <b>Web of Science</b> | (TS=(COVID-19 OR SARS-CoV-2 OR COVID-19 pandemic OR Corona virus) AND TS=(Physical Activit* OR Physical Exercise* OR Home Workout) AND PY=(2020 OR 2021)) AND LANGUAGE: (English OR German)                                                                                                                                                                                 | 1545        | 1545                                        |
| <b>Scopus</b>         | (TITLE-ABS-KEY(COVID-19) OR TITLE-ABS-KEY(SARS-CoV-2) OR TITLE-ABS-KEY(COVID 19 pandemic) OR TITLE-ABS-KEY(Corona virus) AND TITLE-ABS-KEY(Physical Activit*) OR TITLE-ABS-KEY(Physical Exercise*) OR TITLE-ABS-KEY(Home Workout)) AND ( LIMIT-TO ( PUBYEAR, 2020) OR LIMIT-TO ( PUBYEAR, 2021) ) AND ( LIMIT-TO ( LANGUAGE,"English" ) OR LIMIT-TO ( LANGUAGE,"German" ) ) | 2801        | 1489                                        |
| <b>Pubmed</b>         | ((Covid-19[Title/Abstract]) OR (Coronavirus[Title/Abstract]) OR (SARS-CoV-2[Title/Abstract]) OR (Covid 19 pandemic[Title/Abstract])) AND ((Physical Activit*[Title/Abstract]) OR (Physical Exercise*[Title/Abstract]) OR (Home Workout[Title/Abstract])) AND ((english[Filter] OR german[Filter]) AND (2020:2021[pdat]))                                                    | 1275        | 148                                         |
| <b>Total:</b>         |                                                                                                                                                                                                                                                                                                                                                                             | <b>5621</b> | <b>3182</b>                                 |
